# Supplementary material for: Mussel-inspired strong and tough hydrogel with self-adhesive properties based on dynamic interactions for flexible wearable electronics
Source: Royal Society of Chemistry journal article supplement (doi:10.1039/d4ta08383k), 2025-01-01
Supplement: d4ta08383k3.pdf [file d4ta08383k3.pdf]

**Supporting Information**

**Mussel-inspired Strong and Tough Hydrogel with  
Self-adhesive based on Dynamic Interactions for  
Flexible Wearable Electronics**

*Xiaoyong Zhang<sup>a, \*</sup>, Fan Li<sup>a</sup>, Zhaozhao Li<sup>a</sup>, Yongping Bai<sup>b</sup>*

<sup>a</sup> School of Materials Science and Engineering, The First Affiliated Hospital of Anhui University of Science and Technology, Anhui University of Science and Technology, Huainan, Anhui 232001, P. R. China

<sup>b</sup> School of Chemistry and Chemical Engineering, Harbin Institute of Technology, Harbin, Heilongjiang 150000, P. R. China

*\* Corresponding authors.*

*E-mail: [xiaoyongzhang@aust.edu.cn](mailto:xiaoyongzhang@aust.edu.cn) (X. Zhang)*

**Table S1** Formulations of prepared PVA-DBA hydrogel.

| Sample                       | Comprise (g) |     |     |                   |                                   |                  |                  |      |
|------------------------------|--------------|-----|-----|-------------------|-----------------------------------|------------------|------------------|------|
|                              | PVA-DOPA     | AM  | PAA | MBA<br>(0.1 wt.%) | Fe(NO <sub>3</sub> ) <sub>3</sub> | Irgacure<br>2959 | H <sub>2</sub> O | NaCl |
| PVA-DBA-0                    | 0            | 0.2 | 0.1 | 0.6               | 0.048                             | 0.01             | 0.4              | 0.01 |
| PVA-DBA-0.1                  | 0.1          | 0.2 | 0.1 | 0.6               | 0.048                             | 0.01             | 0.4              | 0.01 |
| PVA-DBA-0.2                  | 0.2          | 0.2 | 0.1 | 0.6               | 0.048                             | 0.01             | 0.4              | 0.01 |
| PVA-DBA-0.3                  | 0.3          | 0.2 | 0.1 | 0.6               | 0.048                             | 0.01             | 0.4              | 0.01 |
| PVA-DBA-0.4                  | 0.4          | 0.2 | 0.1 | 0.6               | 0.048                             | 0.01             | 0.4              | 0.01 |
| PVA-DBA-0@Fe <sup>3+</sup>   | 0            | 0.2 | 0.1 | 0.6               | 0                                 | 0.01             | 0.4              | 0.01 |
| PVA-DBA-0.1@Fe <sup>3+</sup> | 0.1          | 0.2 | 0.1 | 0.6               | 0                                 | 0.01             | 0.4              | 0.01 |
| PVA-DBA-0.2@Fe <sup>3+</sup> | 0.2          | 0.2 | 0.1 | 0.6               | 0                                 | 0.01             | 0.4              | 0.01 |
| PVA-DBA-0.3@Fe <sup>3+</sup> | 0.3          | 0.2 | 0.1 | 0.6               | 0                                 | 0.01             | 0.4              | 0.01 |
| PVA-DBA-0.4@Fe <sup>3+</sup> | 0.4          | 0.2 | 0.1 | 0.6               | 0                                 | 0.01             | 0.4              | 0.01 |

**Table S2** Monomer conversion of the =CH<sub>2</sub> bond from PVA-DBA hydrogel as a function of UV irradiation time.

| UV irradiation time<br>(min) | Monomer conversion<br>(%) |
|------------------------------|---------------------------|
| 0                            | 0                         |
| 2                            | 1.9                       |
| 4                            | 4.6                       |
| 8                            | 12.3                      |
| 12                           | 25.5                      |
| 16                           | 80.4                      |
| 20                           | 94.6                      |

**Table S3** Mechanical properties of prepared PVA-DBA-x hydrogel.

| Sample      | Mechanical properties |                    |                               |                       |
|-------------|-----------------------|--------------------|-------------------------------|-----------------------|
|             | Maximum stress (kPa)  | Maximum strain (%) | Toughness (J/m <sup>3</sup> ) | Young's modulus (kPa) |
| PVA-DBA-0   | 2.5                   | 37                 | 72.0                          | 6.2                   |
| PVA-DBA-0.1 | 16.9                  | 221                | 1526.9                        | 7.3                   |
| PVA-DBA-0.2 | 14.7                  | 144                | 1349.9                        | 16.2                  |
| PVA-DBA-0.3 | 19.7                  | 145                | 1653.5                        | 16.5                  |
| PVA-DBA-0.4 | 28.7                  | 148                | 2178.8                        | 17.2                  |

**Table S4** Mechanical properties of prepared PVA-DBA-x @Fe<sup>3+</sup> hydrogel.

| Sample                       | Mechanical properties |                    |                               |                       |
|------------------------------|-----------------------|--------------------|-------------------------------|-----------------------|
|                              | Maximum stress (kPa)  | Maximum strain (%) | Toughness (J/m <sup>3</sup> ) | Young's modulus (kPa) |
| PVA-DBA-0@Fe <sup>3+</sup>   | 19.3                  | 33                 | 413.7                         | 10.2                  |
| PVA-DBA-0.1@Fe <sup>3+</sup> | 30.2                  | 125                | 2581.1                        | 15.6                  |
| PVA-DBA-0.2@Fe <sup>3+</sup> | 78.6                  | 128                | 5156.8                        | 20.4                  |
| PVA-DBA-0.3@Fe <sup>3+</sup> | 92.8                  | 101                | 4845.5                        | 60.4                  |
| PVA-DBA-0.4@Fe <sup>3+</sup> | 122.3                 | 74                 | 5938.1                        | 151.1                 |

**Table S5** Adhesion performance of PVA-DBA-x @Fe<sup>3+</sup> hydrogel for various substrates.

| Sample                       | Adhesive strength (kPa) |                 |          |              |      |
|------------------------------|-------------------------|-----------------|----------|--------------|------|
|                              | Glass                   | Stainless steel | Aluminum | Porcine skin | PTFE |
| PVA-DBA-0@Fe <sup>3+</sup>   | 50.6                    | 56.5            | 53.8     | 12.3         | 13.0 |
| PVA-DBA-0.1@Fe <sup>3+</sup> | 75.5                    | 68.0            | 57.4     | 44.5         | 18.8 |
| PVA-DBA-0.2@Fe <sup>3+</sup> | 87.5                    | 77.0            | 70.3     | 63.0         | 31.4 |
| PVA-DBA-0.3@Fe <sup>3+</sup> | 60.3                    | 54.6            | 42.1     | 35.4         | 18.9 |
| PVA-DBA-0.4@Fe <sup>3+</sup> | 40.7                    | 26.8            | 26.5     | 24.5         | 13.7 |

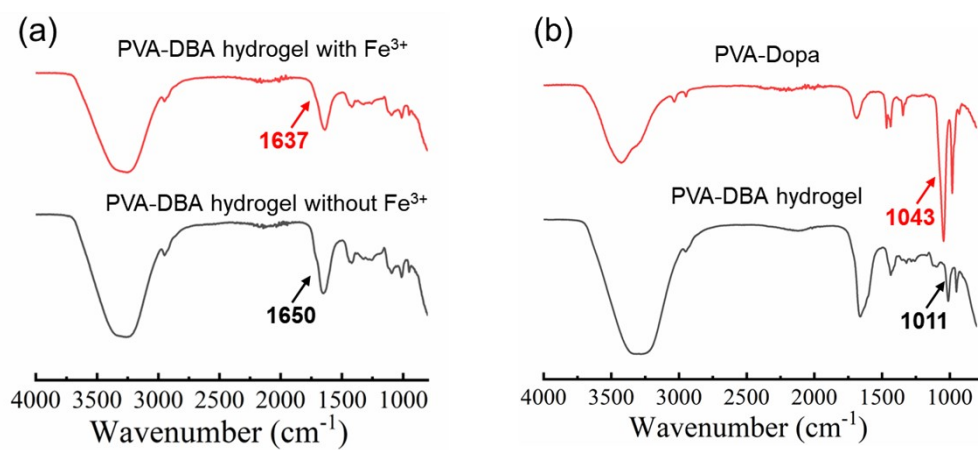

**Figure S1** Structure characterization of PVA-DBA hydrogels. a) PVA-DBA hydrogel with and without Fe<sup>3+</sup>. b) FT-IR spectra of PVA-DOPA and PVA-DBA hydrogel with Fe<sup>3+</sup>.
